# Supplementary material for: Exploring Plastic Mulching as a Strategy for Mitigating Drought Stress and Boosting Maize Yield in the Ecuadorian Andes
Source: MDPI journal article supplement (doi:10.3390/w16071033), 2024-04-03
Supplement: s1 [file s1]

Archive with 1 entries (1 files):
- water-2900852-supplementary.pdf
