# Supplementary material for: Exploring Plastic Mulching as a Strategy for Mitigating Drought Stress and Boosting Maize Yield in the Ecuadorian Andes
Source: MDPI journal article supplement (doi:10.3390/w16071033), 2024-04-03
Supplement: s1 [file s1 › water-2900852-supplementary.pdf]

Supplementary Table S1. Economic benefit of the use of plastic mulching in maize grown during the dry season (June-August) in the highlands of Ecuador, 2019-2020.

| Maize variety | Planting system (T)   | Yield, fresh ears (t ha <sup>-1</sup> ) |           | Yield surplus (t ha <sup>-1</sup> ) |           | Additional income* (USD ha <sup>-1</sup> ) |           |       | Benefit* (USD ha <sup>-1</sup> ) |
|---------------|-----------------------|-----------------------------------------|-----------|-------------------------------------|-----------|--------------------------------------------|-----------|-------|----------------------------------|
|               |                       | Year 2019                               | Year 2020 | Year 2019                           | Year 2020 | Year 2019                                  | Year 2020 | Total |                                  |
| INIAP 101     | Plastic mulching      | 6.24                                    | 7.49      | 3.12                                | 5.15      | 936                                        | 1545      | 2481  | 1201                             |
|               | Conventional practice | 3.12                                    | 2.34      | -                                   | -         | -                                          | -         | -     | -                                |
| INIAP 122     | Plastic mulching      | 3.79                                    | 6.50      | 2.59                                | 1.77      | 777                                        | 531       | 1308  | 28                               |
|               | Conventional practice | 1.20                                    | 4.73      | -                                   | -         | -                                          | -         | -     | -                                |
| Average       |                       |                                         |           | 2.86                                | 3.46      | 857                                        | 1038      | 1895  | 615                              |

\*Price of fresh corn (paid to farmers): 0.30 USD kg<sup>-1</sup>

•Benefit = additional income – cost of the plastic (1280 USD ha<sup>-1</sup>)
